# Supplementary material for: Airborne validation of radiative transfer modelling of ice clouds at millimetre and sub-millimetre wavelengths
Source: Copernicus journal article supplement (doi:10.5194/amt-12-1599-2019), 2019-03-12
Supplement: Supplementary file [file amt-12-1599-2019-supplement.pdf]

Supplement of Atmos. Meas. Tech., 12, 1599–1617, 2019  
<https://doi.org/10.5194/amt-12-1599-2019-supplement>  
© Author(s) 2019. This work is distributed under  
the Creative Commons Attribution 4.0 License.

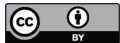

*Supplement of*

## **Airborne validation of radiative transfer modelling of ice clouds at millimetre and sub-millimetre wavelengths**

**Stuart Fox et al.**

*Correspondence to:* Stuart Fox ([stuart.fox@metoffice.gov.uk](mailto:stuart.fox@metoffice.gov.uk))

The copyright of individual parts of the supplement might differ from the CC BY 4.0 License.

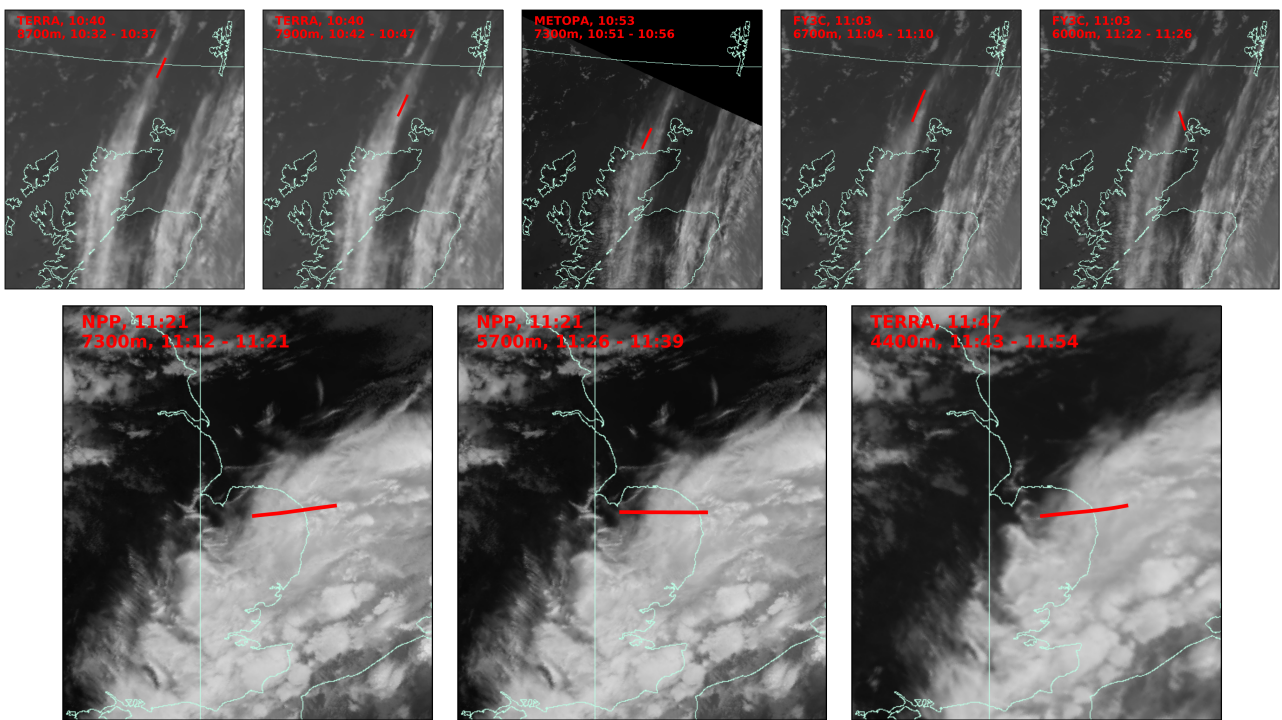

Figure 1: 10.8  $\mu\text{m}$  polar orbiting satellite images and aircraft tracks during in-situ sampling runs for B895 (top) and B939 (bottom). The satellite, overpass time, run altitude and run times are indicated on the plots.
